# Supplementary material
Source: PubMed Central journal article supplement (PMC1691561)

This is an electronic appendix to the paper by Conant & Wagner 2003 Duplicate genes and robustness to transient gene knockouts in *Caenorhabditis elegans*. *Proc. R. Soc. Lond. B* **271**, 89–96. (DOI 10.1098/rspb.2003.2560.)

Electronic appendices are refereed with the text. However, no attempt has been made to impose a uniform editorial style on the electronic appendices.

Electronic Appendix A

Figure 5

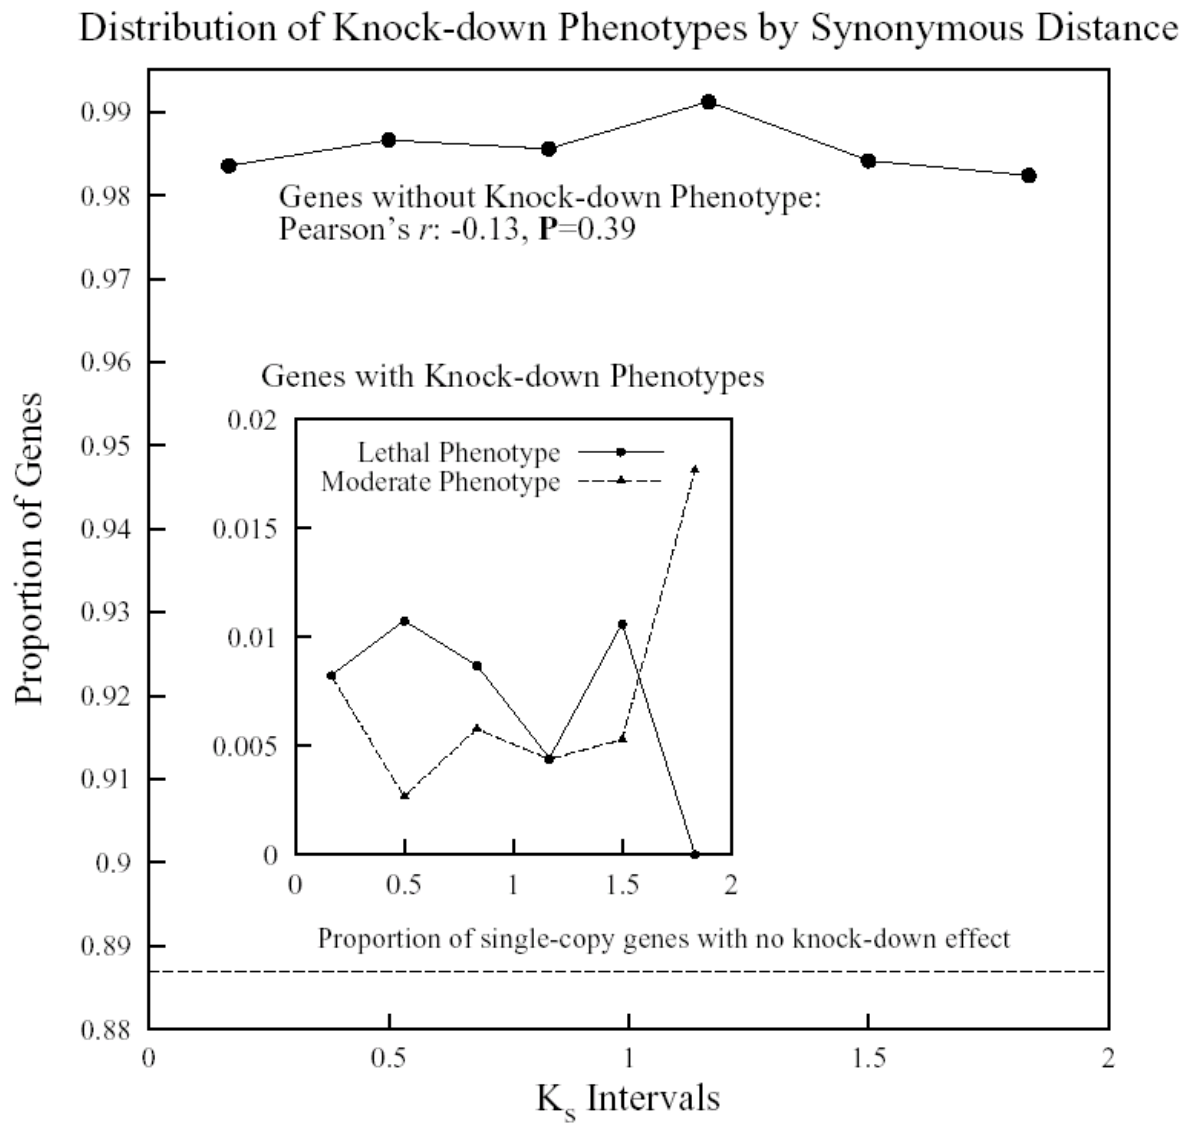

Figure 6.

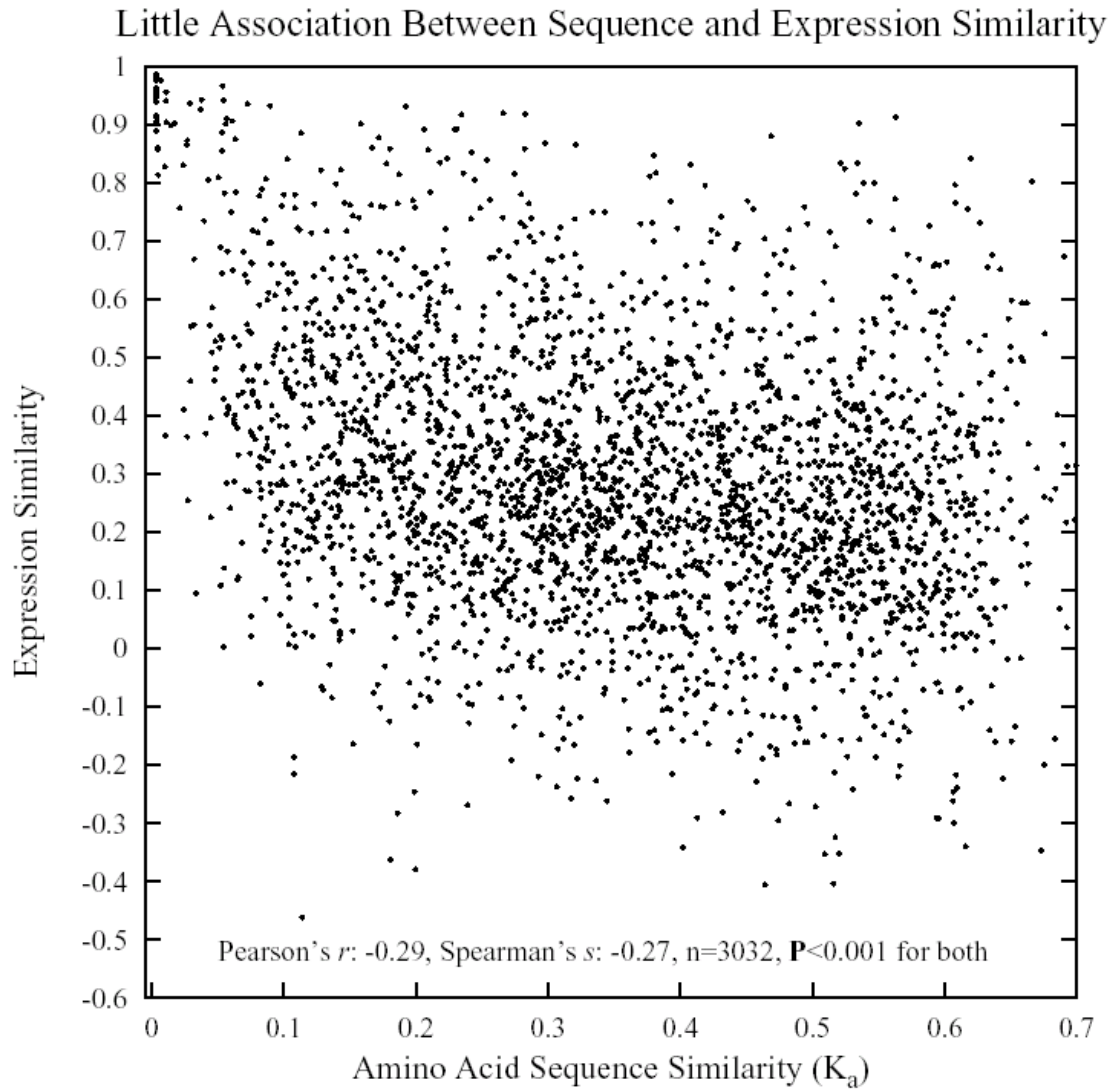

Supplement: 15002776s01.pdf [file 15002776s01.pdf]
